# Supplementary material for: Flicker-induced eye movements and the behavioural temporal cut-off frequency in a nocturnal spider
Source: Oxford University Press journal article supplement (doi:10.1242/jeb.060855), 2011-10-12
Supplement: jeb060855figs1.pdf [file jeb060855figs1.pdf]

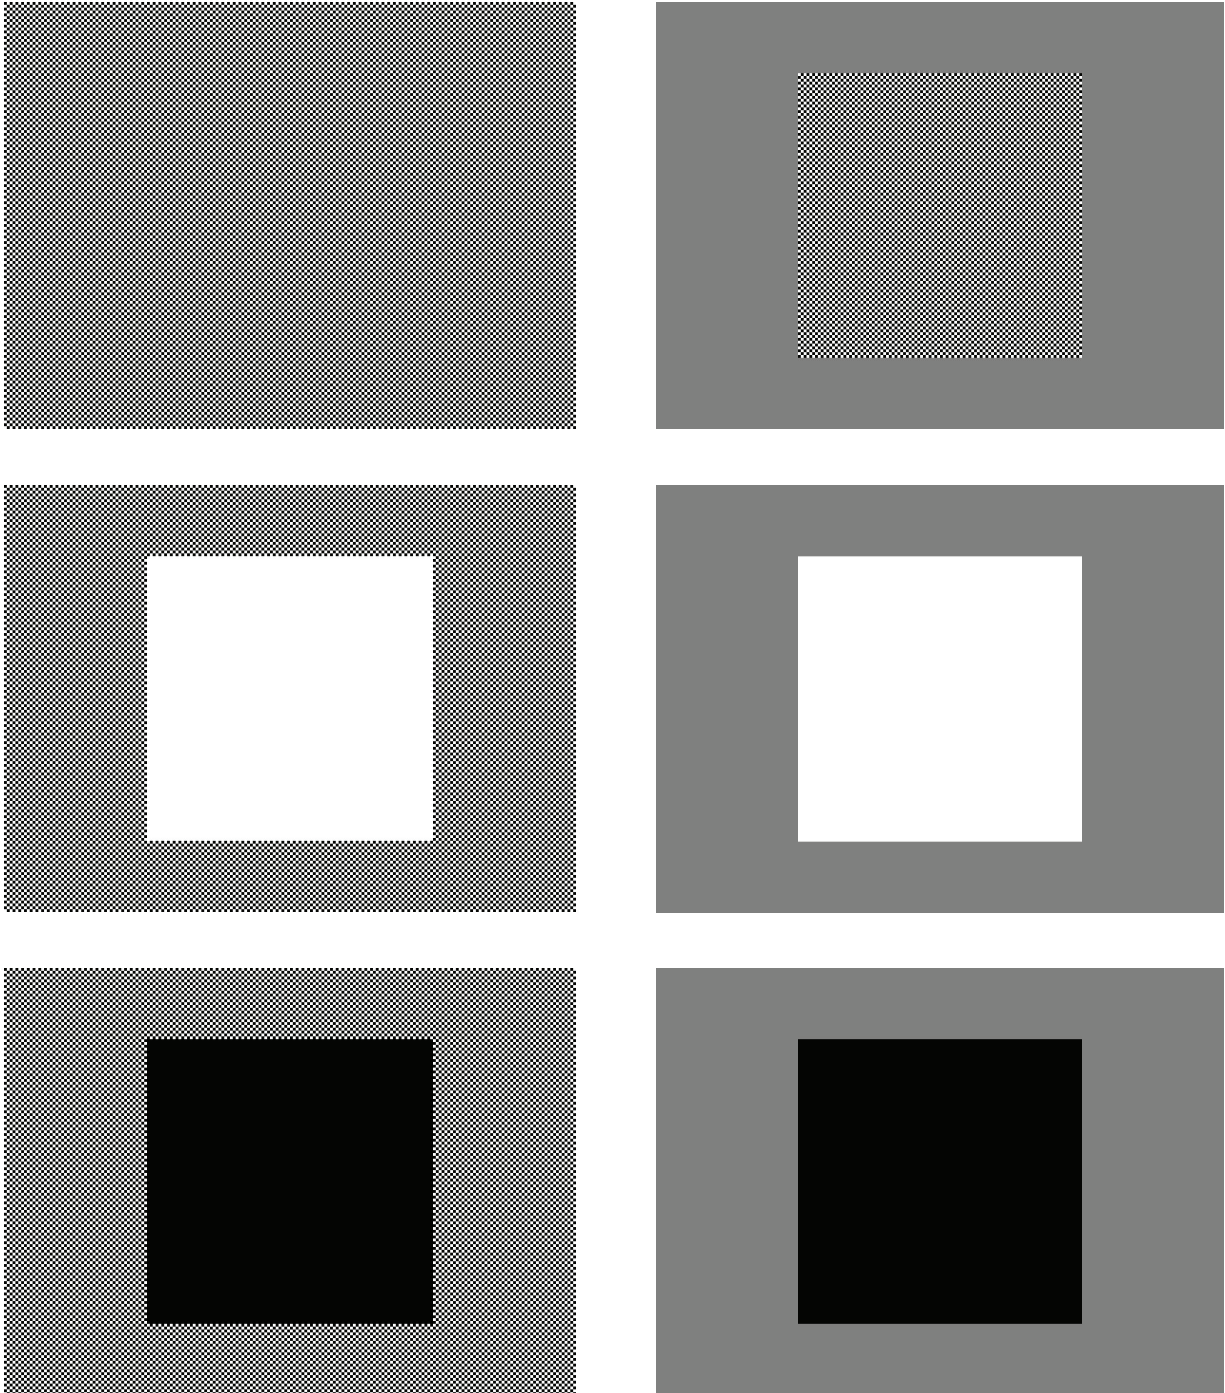

**Suppl. 1.** Screenshots of the stimuli presented in our experiments. The left column shows the stimulus for the first experimental series (slow flicker and step stimuli), the right column the stimuli used in the second series (determination of the behavioural cut-off).
